# Supplementary material
Source: Springer Nature journal article supplement (https://www.springermedizin.de/resource/supplementary/12885_2007_784_MOESM4_ESM.pdf/9470326)

% survival

(lymph node positive)

$p=.02$  at 3 years  
 $p=.20$  at 10 years

— Others  
— ER-, PR-, HER2-

n at risk

|                 |     |     |     |     |     |     |     |    |    |    |    |
|-----------------|-----|-----|-----|-----|-----|-----|-----|----|----|----|----|
| Others:         | 149 | 146 | 140 | 128 | 116 | 106 | 100 | 87 | 76 | 62 | 56 |
| ER-, PR-, HER2- | 13  | 13  | 11  | 11  | 7   | 7   | 7   | 7  | 7  | 4  | 3  |

years after breast cancer occurrence

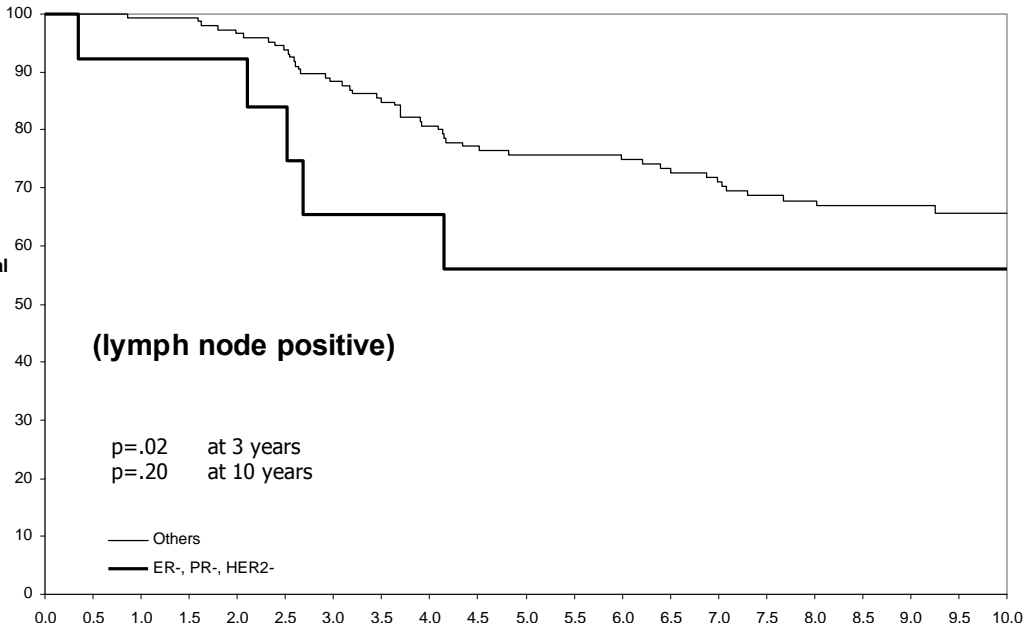

Supplement: MOESM4 [file 9470326]
